# Supplementary material for: Metatranscriptomic analysis of a high-sulfide aquatic spring reveals insights into sulfur cycling and unexpected aerobic metabolism
Source: PubMed Central journal article supplement (PMC4582958; doi:10.7717/peerj.1259), 2015-09-22
Supplement: peerj-03-1259-s001.pdf [file peerj-03-1259-s001.pdf]

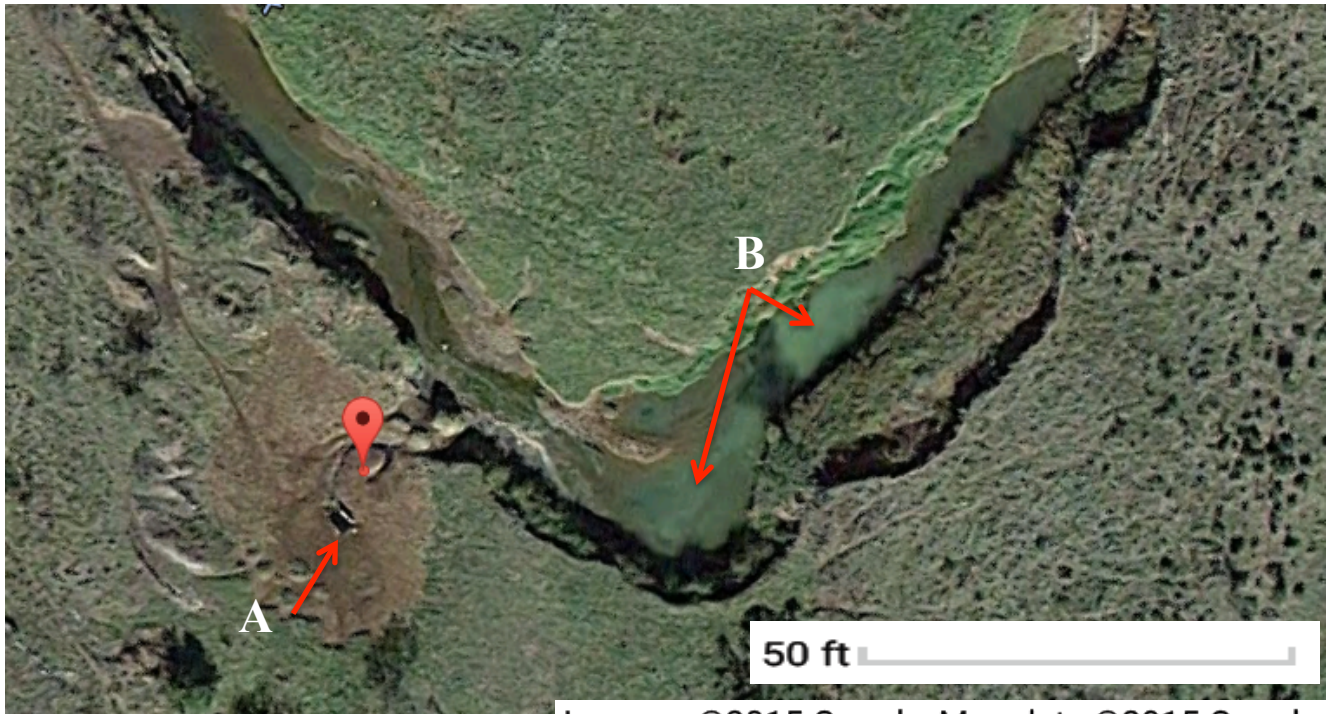

Imagery ©2015 Google, Map data ©2015 Google

**Supplemental Figure 1.** South-facing corner of Zodletone Spring (A), where four sediment samples were taken for RNA extraction and processing. Downstream of where the spring's stream enters Saddle Mountain Creek (B) shows a vibrant phototrophic plume. Image obtained from Google Earth ©2015.
