# Supplementary material for: Metatranscriptomic analysis of a high-sulfide aquatic spring reveals insights into sulfur cycling and unexpected aerobic metabolism
Source: PubMed Central journal article supplement (PMC4582958; doi:10.7717/peerj.1259), 2015-09-22
Supplement: peerj-03-1259-s002.pdf [file peerj-03-1259-s002.pdf]

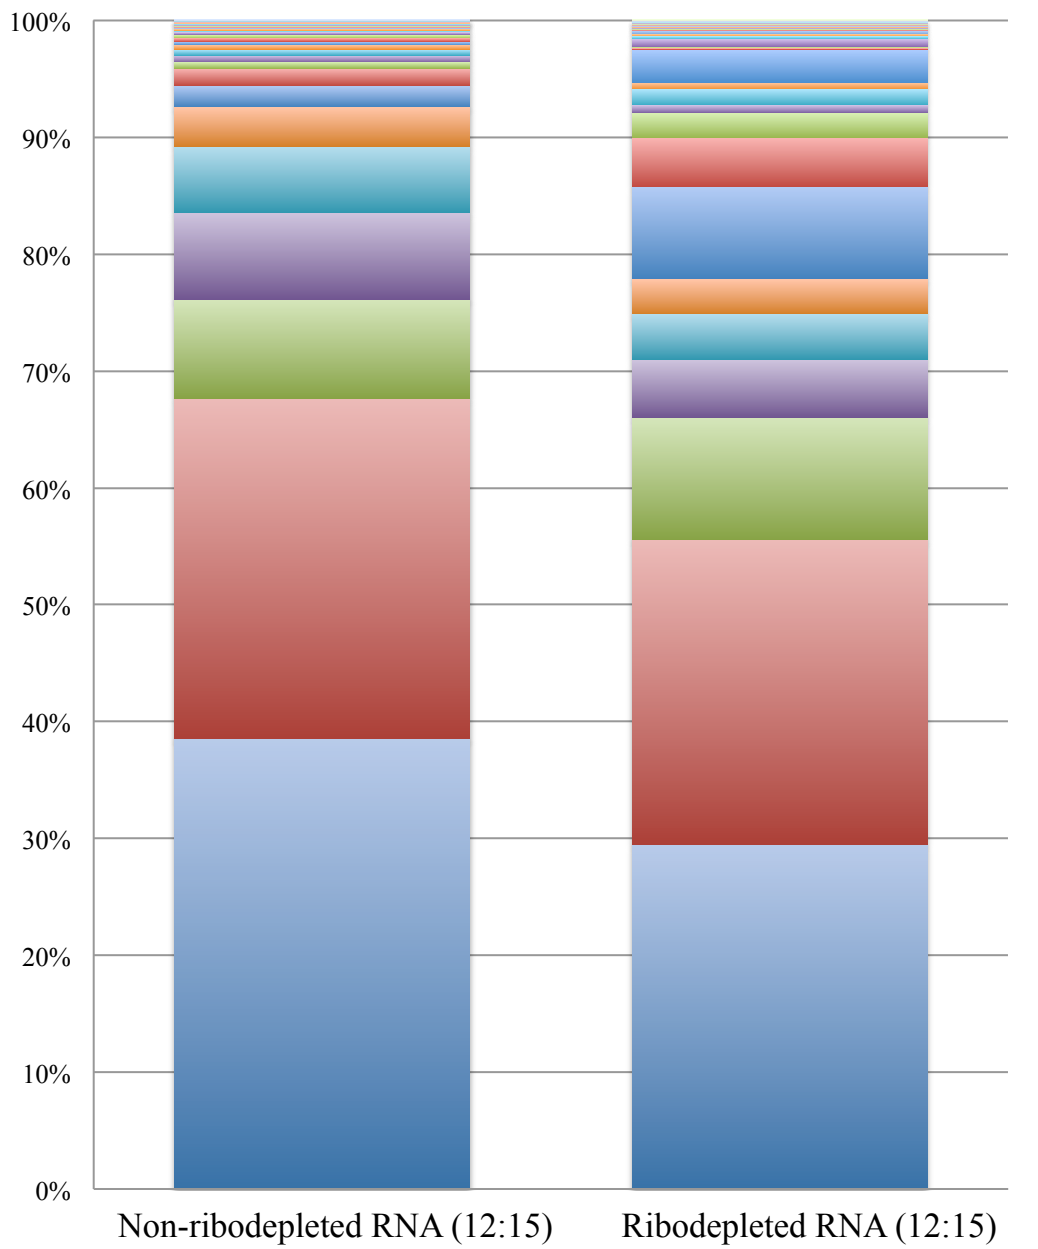

- |                |                      |                       |               |
|----------------|----------------------|-----------------------|---------------|
| SR1            | OP10                 | Gemmatimonadetes      | Nitrospira    |
| OD1            | Chlamydiae           | OP11                  | Synergistetes |
| Lentisphaerae  | Chlorobi             | TM7                   | Thermotogae   |
| BRC1           | Deferribacteres      | Deinococcus-Thermus   | WS3           |
| Fibrobacteres  | unclassified_Archaea | Tenericutes           | Fusobacteria  |
| Crenarchaeota  | Acidobacteria        | Verrucomicrobia       | Cyanobacteria |
| Planctomycetes | Chloroflexi          | Euryarchaeota         | Spirochaetes  |
| Actinobacteria | Firmicutes           | unclassified_Bacteria | Bacteroidetes |
| Proteobacteria |                      |                       |               |

**Supplemental Figure 2.** SSU rRNA-based microbial community composition from datasets obtained from non-ribodepleted RNA (left) vs. ribodepleted RNA (right).
